# Supplementary material
Source: PubMed Central journal article supplement (PMC3434498)

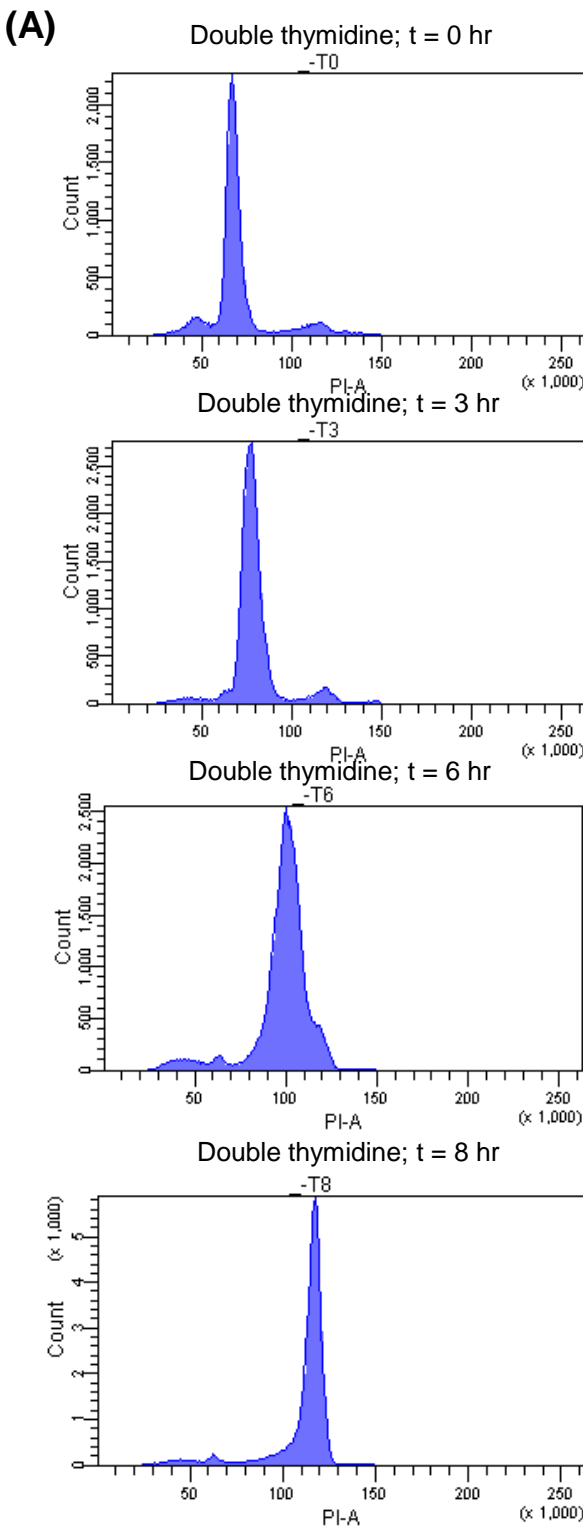

(A) Flow cytometry data for HeLa synchronization experiment with the unlabeled histone data using a double thymidine block. (B-D) Flow cytometry data for HeLa synchronization experiment using a double thymidine block for the heavy methyl experiments. (E) Flow cytometry data for HeLa synchronization experiment using a thymidine/nocodazole block for the heavy methyl experiments. (F) Flow cytometry data for HeLa synchronization experiment using a thymidine/nocodazole block for the qRT-PCR analysis. (G) Flow cytometry data for HeLa synchronization experiment for microarray experiments.

**(B)** Double thymidine; t = 3 hr

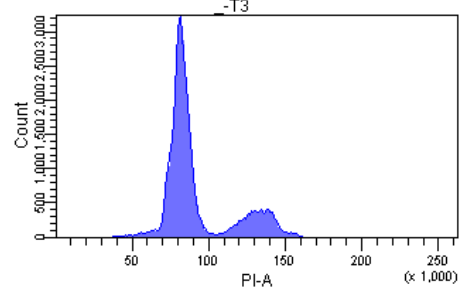

Double thymidine; t = 14 hr

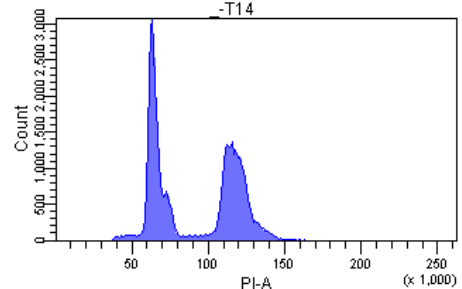

Double thymidine; t = 6 hr

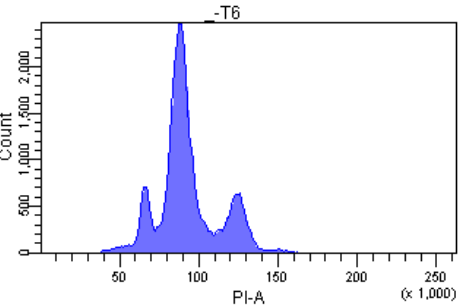

Double thymidine; t = 8 hr

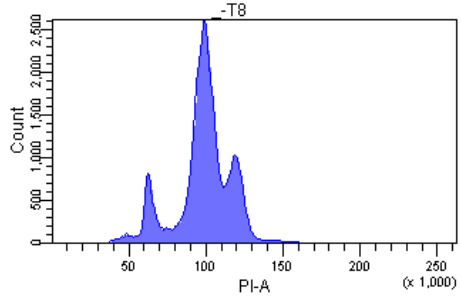

Double thymidine; t = 10 hr

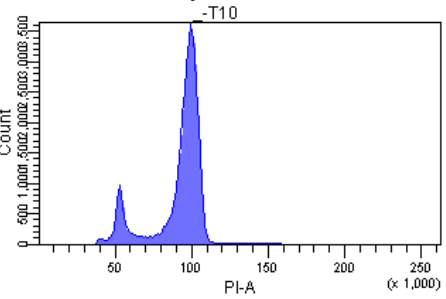

Double thymidine; t = 12 hr

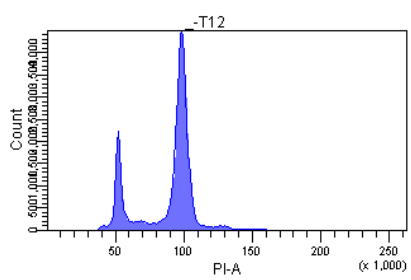

**(C)**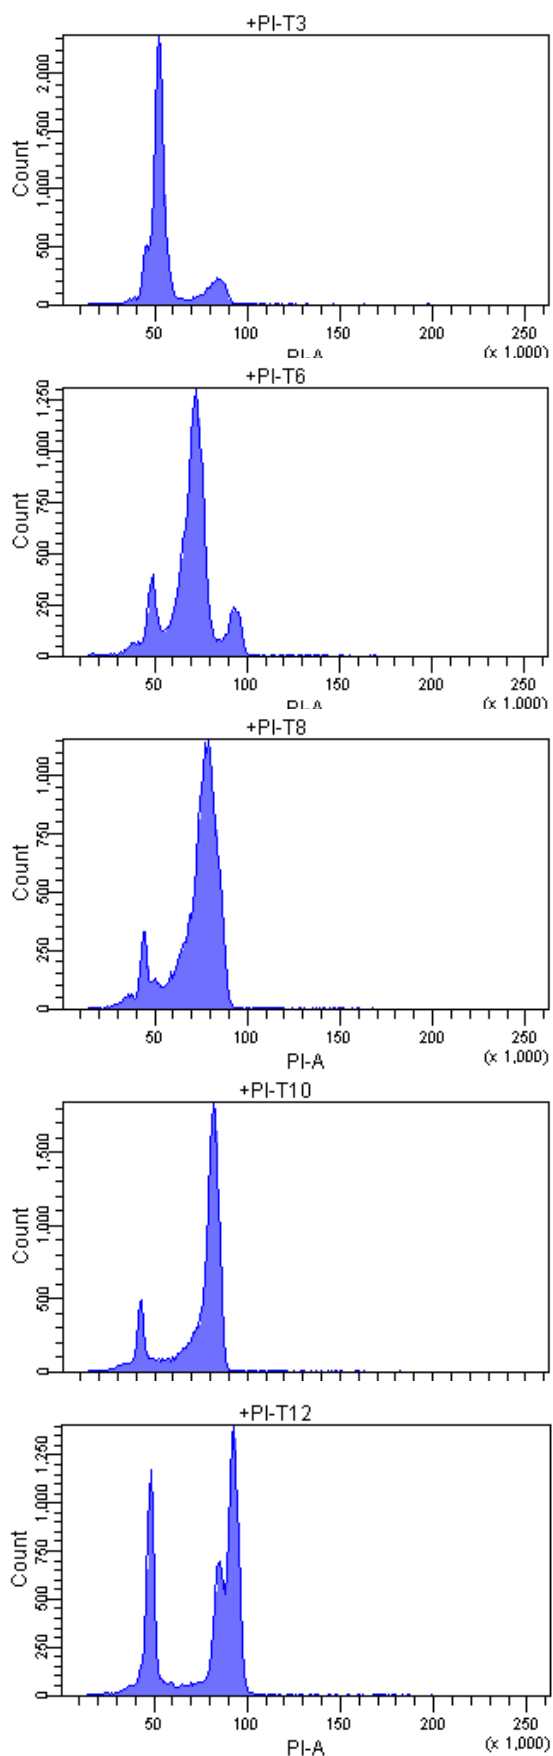**(D)**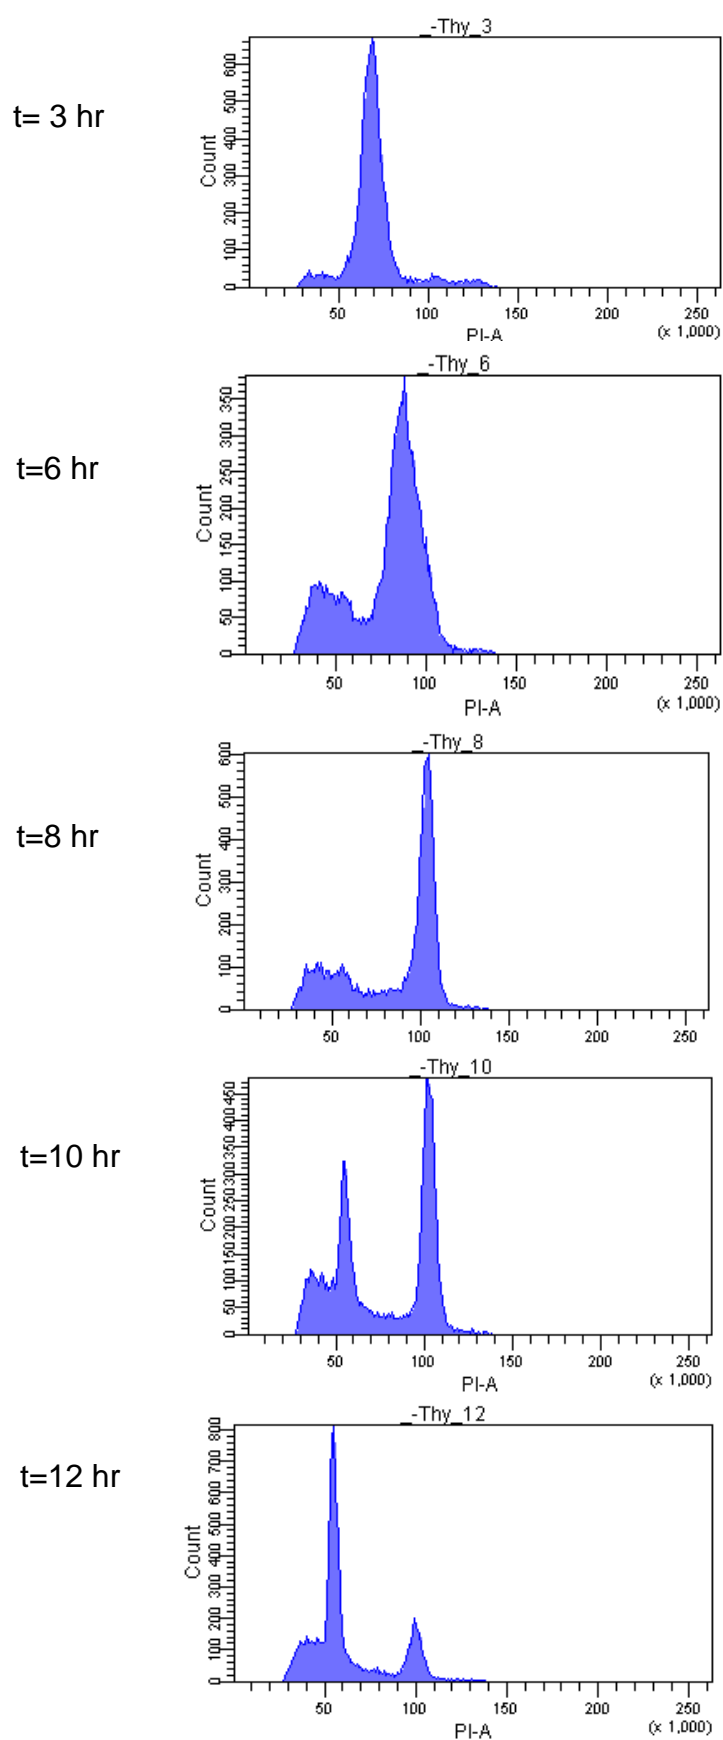

**(E)** Thymidine/Nocodazole;  
t = 3 hr

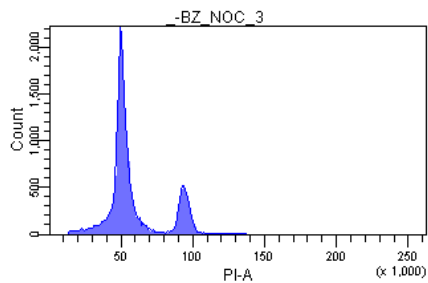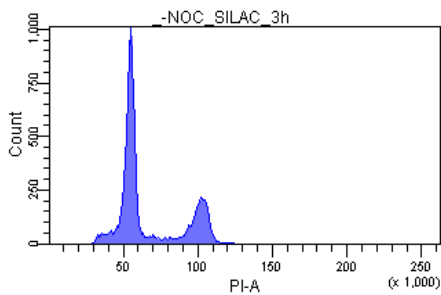

Thymidine/Nocodazole;  
t = 6 hr

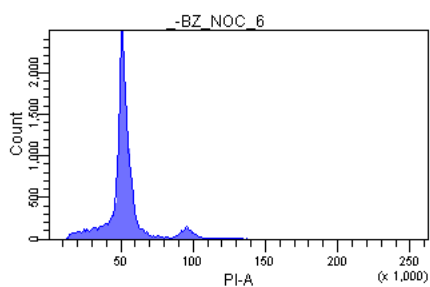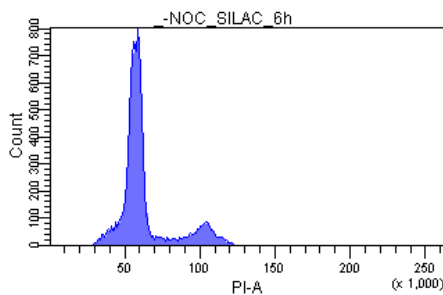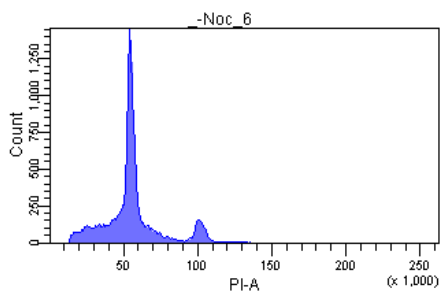

Thymidine/Nocodazole;  
t = 12 hr

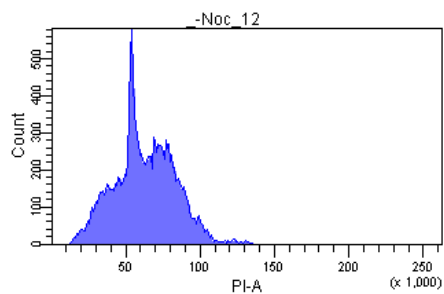

(F)

Thymidine/Nocodazole; t = 0.5 hr

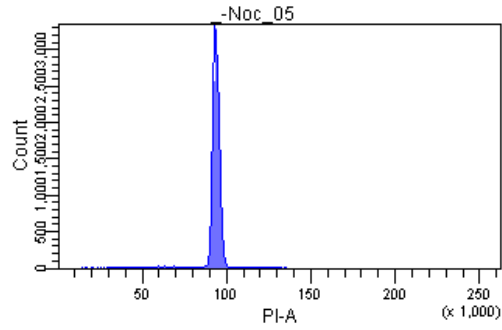

Thymidine/Nocodazole; t = 3 hr

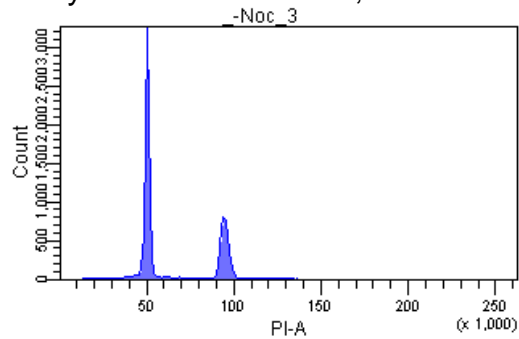

Thymidine/Nocodazole; t = 10 hr

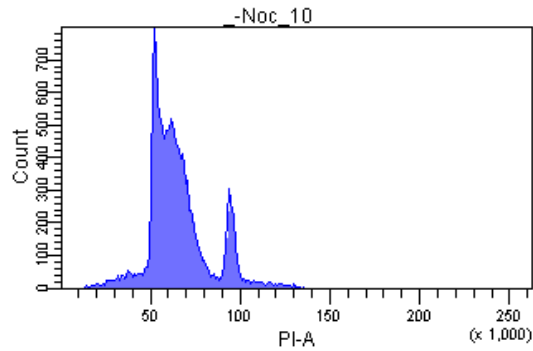

Thymidine/Nocodazole; t = 12 hr

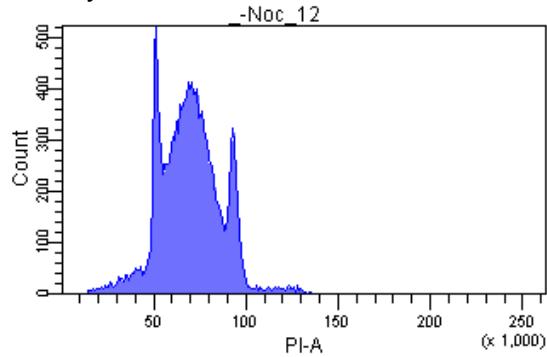

**(G)**

Double thymidine; t = 3 hr  
G1 enriched

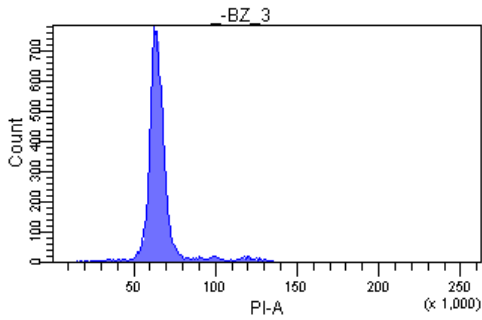

Double thymidine; t = 0.5 hr  
G1 enriched

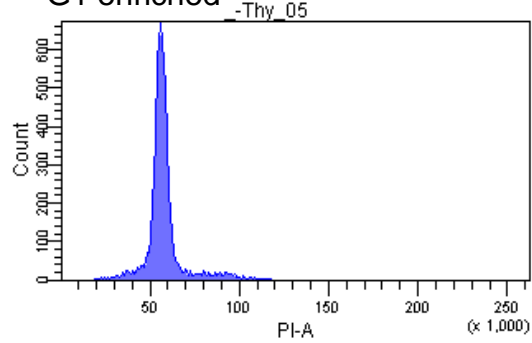

Double thymidine; t = 6 hr  
S enriched

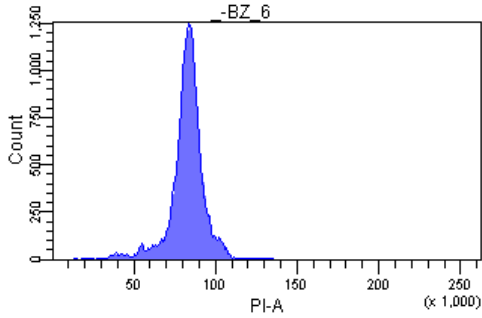

Double thymidine; t = 3 hr  
S enriched

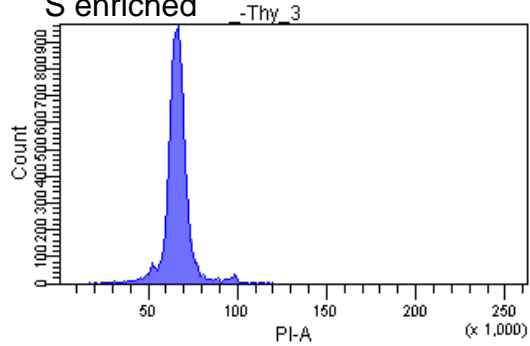

Double thymidine; t = 10 hr  
G2/M enriched

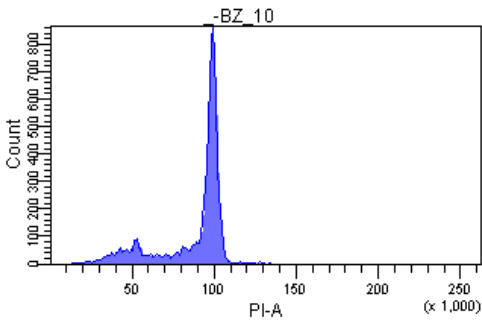

Double thymidine; t = 6 hr  
G2/M enriched

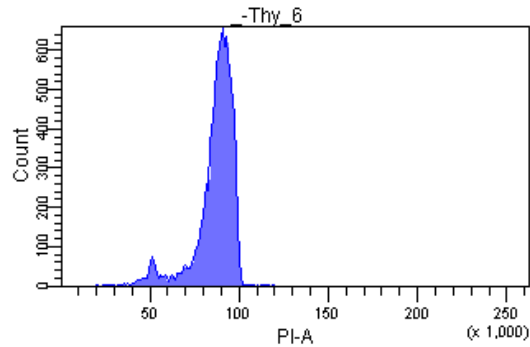

Supplement: MCB.06673-11_zmb999109541so1.pdf [file MCB.06673-11_zmb999109541so1.pdf]
