# Supplementary material
Source: PubMed Central journal article supplement (PMC3434498)
Supplement: MCB.06673-11_zmb999109541so2.pdf [file MCB.06673-11_zmb999109541so2.pdf]

**Supplemental File 2.** Histone peptides used for MS quantification. Abbreviations: pr = propionyl, un = unmodified, me = methyl, ac = acetyl, ph=phosphate, ox = oxidation. For the simplified notation for methylated peptides, meX:Y represents X number of total methyl groups (i.e.  $^{12}\text{CH}_3$  and  $^{13}\text{CD}_3$ ) and Y number of  $^{13}\text{CD}_3$ -methyl groups, and MX:Y represents X number of methionine residues and Y number of  $^{13}\text{CD}_3$ -methionine residues.

| Histone peptide sequence                                            | Simplified notation | Expected m/z (charge state) | Observed m/z |
|---------------------------------------------------------------------|---------------------|-----------------------------|--------------|
| <b>H3 3-7 peptide</b>                                               |                     |                             |              |
| prTK <sub>pr</sub> QTAR                                             | H3K4un              | 816.458 (+1)                | 816.458      |
|                                                                     |                     | 408.733 (+2)                | 408.733      |
| prTK <sub>pr,me1:0</sub> QTAR                                       | H3K4me1:0           | 830.474 (+1)                | 830.473      |
|                                                                     |                     | 415.741 (+2)                | 415.741      |
| prTK <sub>pr,me1:1</sub> QTAR                                       | H3K4me1:1           | 834.494 (+1)                | 834.495      |
|                                                                     |                     | 417.751 (+2)                | 417.751      |
| <b>H3 9-17 peptide</b>                                              |                     |                             |              |
| prK <sub>pr</sub> STGGK <sub>pr</sub> APR                           | H3K9un              | 1069.601 (+1)               | 1069.601     |
|                                                                     |                     | 535.304 (+2)                | 535.305      |
| prK <sub>pr,me1:0</sub> STGGK <sub>pr</sub> APR                     | H3K9me1:0           | 1083.616 (+1)               | 1083.615     |
|                                                                     |                     | 542.312 (+2)                | 542.312      |
| prK <sub>pr,me1:1</sub> STGGK <sub>pr</sub> APR                     | H3K9me1:1           | 1087.637 (+1)               | 1087.638     |
|                                                                     |                     | 544.322 (+2)                | 544.323      |
| prK <sub>me2:0</sub> STGGK <sub>pr</sub> APR                        | H3K9me2:0           | 521.307 (+2)                | 521.307      |
|                                                                     |                     | 347.874 (+3)                | 347.873      |
| prK <sub>me2:1</sub> STGGK <sub>pr</sub> APR                        | H3K9me2:1           | 523.317 (+2)                | 523.317      |
|                                                                     |                     | 349.214 (+3)                | 349.214      |
| prK <sub>me2:2</sub> STGGK <sub>pr</sub> APR                        | H3K9me2:2           | 525.327 (+2)                | 525.328      |
|                                                                     |                     | 350.554 (+3)                | 350.555      |
| prK <sub>me3:0</sub> STGGK <sub>pr</sub> APR                        | H3K9me3:0           | 528.314 (+2)                | 528.314      |
|                                                                     |                     |                             |              |
| prK <sub>me3:1</sub> STGGK <sub>pr</sub> APR                        | H3K9me3:1           | 530.325 (+2)                | 530.324      |
|                                                                     |                     |                             |              |
| prK <sub>me3:2</sub> STGGK <sub>pr</sub> APR                        | H3K9me3:2           | 532.335 (+2)                | 532.336      |
|                                                                     |                     |                             |              |
| prK <sub>me3:3</sub> STGGK <sub>pr</sub> APR                        | H3K9me3:3           | 534.345 (+2)                | 534.346      |
|                                                                     |                     |                             |              |
| prK <sub>me2:0</sub> S <sub>ph</sub> TGGK <sub>pr</sub> APR         | H3K9me2:0S10ph      | 561.290 (+2)                | 561.290      |
|                                                                     |                     | 374.529 (+3)                | 374.529      |
| <b>H3 27-40 peptide</b>                                             |                     |                             |              |
| prK <sub>pr</sub> SAPATGGVK <sub>pr</sub> K <sub>pr</sub> PHR       | H3K27unK36un        | 829.473 (+2)                | 829.473      |
|                                                                     |                     | 553.318 (+3)                | 553.318      |
| prK <sub>pr,me1:0</sub> SAPATGGVK <sub>pr</sub> K <sub>pr</sub> PHR | H3K27me1:0K36un     | 836.481 (+2)                | 836.482      |
|                                                                     |                     | 557.990 (+3)                | 557.991      |
| prK <sub>pr</sub> SAPATGGVK <sub>pr,me1:0</sub> K <sub>pr</sub> PHR | H3K27unK36me1:0     | “ “ (+2)                    | 836.480      |
|                                                                     |                     | “ “ (+3)                    | 557.989      |
| prK <sub>pr,me1:1</sub> SAPATGGVK <sub>pr</sub> K <sub>pr</sub> PHR | H3K27me1:1K36un     | 838.491 (+2)                | 838.492      |
|                                                                     |                     | 559.330 (+3)                | 559.331      |
| prK <sub>pr</sub> SAPATGGVK <sub>pr,me1:1</sub> K <sub>pr</sub> PHR | H3K27unK36me1:1     | “ “ (+2)                    | 838.491      |

|                                                                                      |                    |              |         |
|--------------------------------------------------------------------------------------|--------------------|--------------|---------|
|                                                                                      |                    | “ “ (+3)     | 559.330 |
| pr <sub>K<sub>pr,me1:0</sub></sub> SAPATGGVK <sub>pr,me1:0</sub> K <sub>pr</sub> PHR | H3K27me1:0K36me1:0 | 843.489 (+2) | 843.489 |
|                                                                                      |                    | 562.662 (+3) | 562.662 |
| pr <sub>K<sub>me2:0</sub></sub> SAPATGGVK <sub>pr</sub> K <sub>pr</sub> PHR          | H3K27me2:0K36un    | 815.476 (+2) | 815.475 |
|                                                                                      |                    | 543.987 (+3) | 543.987 |
| pr <sub>K<sub>pr</sub></sub> SAPATGGVK <sub>pr,me2:0</sub> K <sub>pr</sub> PHR       | H3K27unK36me2:0    | “ “ (+2)     | 815.475 |
|                                                                                      |                    | “ “ (+3)     | 543.987 |
| pr <sub>K<sub>me2:1</sub></sub> SAPATGGVK <sub>pr</sub> K <sub>pr</sub> PHR          | H3K27me2:1K36un    | 817.486 (+2) | 817.485 |
|                                                                                      |                    | 545.327 (+3) | 545.326 |
| pr <sub>K<sub>pr</sub></sub> SAPATGGVK <sub>pr,me2:1</sub> K <sub>pr</sub> PHR       | H3K27unK36me2:1    | “ “ (+2)     | 817.486 |
|                                                                                      |                    | “ “ (+3)     | 545.327 |
| pr <sub>K<sub>me2:2</sub></sub> SAPATGGVK <sub>pr</sub> K <sub>pr</sub> PHR          | H3K27me2:2K36un    | 819.496 (+2) | 819.497 |
|                                                                                      |                    | 546.667 (+3) | 546.667 |
| pr <sub>K<sub>pr</sub></sub> SAPATGGVK <sub>pr,me2:2</sub> K <sub>pr</sub> PHR       | H3K27unK36me2:2    | “ “ (+2)     | 819.497 |
|                                                                                      |                    | “ “ (+3)     | 546.668 |
| pr <sub>K<sub>me3:0</sub></sub> SAPATGGVK <sub>pr</sub> K <sub>pr</sub> PHR          | H3K27me3:0K36un    | 822.483 (+2) | 822.482 |
|                                                                                      |                    | 548.658 (+3) | 548.658 |
| pr <sub>K<sub>me3:1</sub></sub> SAPATGGVK <sub>pr</sub> K <sub>pr</sub> PHR          | H3K27me3:1K36un    | 824.494 (+2) | 824.493 |
|                                                                                      |                    | 549.998 (+3) | 549.997 |
| pr <sub>K<sub>me3:2</sub></sub> SAPATGGVK <sub>pr</sub> K <sub>pr</sub> PHR          | H3K27me3:2K36un    | 826.504 (+2) | 826.503 |
|                                                                                      |                    | 551.339 (+3) | 551.338 |
| pr <sub>K<sub>me3:3</sub></sub> SAPATGGVK <sub>pr</sub> K <sub>pr</sub> PHR          | H3K27me3:3K36un    | 828.514 (+2) | 828.517 |
|                                                                                      |                    | 552.679 (+3) | 552.679 |
| <b>H3 117-128 peptide</b>                                                            |                    |              |         |
| pr <sub>VTIM<sub>1:0</sub></sub> PK <sub>pr</sub> DIQLAR                             | H3M120 M1:0        | 748.929 (+2) | 748.932 |
| pr <sub>VTIM<sub>ox,1:0</sub></sub> PK <sub>pr</sub> DIQLAR                          | H3M120ox M1:0      | 756.927 (+2) | 756.929 |
| pr <sub>VTIM<sub>1:1</sub></sub> PK <sub>pr</sub> DIQLAR                             | H3M120 M1:1        | 750.940 (+2) | 750.941 |
| pr <sub>VTIM<sub>ox,1:1</sub></sub> PK <sub>pr</sub> DIQLAR                          | H3M120ox M1:1      | 758.937 (+2) | 758.938 |
| <b>H4 20-23 peptide</b>                                                              |                    |              |         |
| pr <sub>K<sub>pr</sub></sub> VLR                                                     | H4K20un            | 627.419 (+1) | 627.419 |
|                                                                                      |                    | 314.214 (+2) | 314.213 |
| pr <sub>K<sub>pr,me1:0</sub></sub> VLR                                               | H4K20me1:0         | 641.435 (+1) | 641.434 |
|                                                                                      |                    | 321.221 (+2) | 321.221 |
| pr <sub>K<sub>pr,me1:1</sub></sub> VLR                                               | H4K20me1:1         | 645.456 (+1) | 645.456 |
|                                                                                      |                    | 323.232 (+2) | 323.232 |
| pr <sub>K<sub>me2:0</sub></sub> VLR                                                  | H4K20me2:0         | 599.424 (+1) | 599.424 |
|                                                                                      |                    | 300.216 (+2) | 300.216 |
| pr <sub>K<sub>me2:1</sub></sub> VLR                                                  | H4K20me2:1         | 603.445 (+1) | 603.446 |
|                                                                                      |                    | 302.226 (+2) | 302.227 |
| pr <sub>K<sub>me2:2</sub></sub> VLR                                                  | H4K20me2:2         | 607.465 (+1) | 607.468 |
|                                                                                      |                    | 304.237 (+2) | 304.237 |
| pr <sub>K<sub>me3:0</sub></sub> VLR                                                  | H4K20me3:0         | 613.439 (+1) | 613.441 |
|                                                                                      |                    | 307.224 (+2) | 307.223 |
| <b>H4 79-92 peptide</b>                                                              |                    |              |         |
| pr <sub>K<sub>pr</sub></sub> TVTAM <sub>1:0</sub> DVVYALK <sub>pr</sub> R            | H4M84 M1:0         | 881.993 (+2) | 881.995 |

|                                            |                          |              |         |
|--------------------------------------------|--------------------------|--------------|---------|
| ${}_{pr}K_{pr}TVTAM_{ox,1:0}DVVYALK_{pr}R$ | H4M84 <sub>ox</sub> M1:0 | 588.331 (+3) | 588.331 |
|                                            |                          | 889.990 (+2) | 889.991 |
|                                            |                          | 593.663 (+3) | 593.663 |
| ${}_{pr}K_{pr}TVTAM_{1:1}DVVYALK_{pr}R$    | H4M84 M1:1               | 884.003 (+2) | 884.005 |
|                                            |                          | 589.671 (+3) | 589.673 |
| ${}_{pr}K_{pr}TVTAM_{ox,1:1}DVVYALK_{pr}R$ | H4M84 <sub>ox</sub> M1:1 | 892.000 (+2) | 892.001 |
|                                            |                          | 595.003 (+3) | 595.003 |
